# Supplementary material
Source: publisher site journal article supplement (https://www.dovepress.com/article/578740)
Supplement: Supplementary file 1 [file 578740%20Supplementary%20Material.pdf]

| <b>Table of contents</b>                                                                                                                            | <b>Page</b> |
|-----------------------------------------------------------------------------------------------------------------------------------------------------|-------------|
| <b>Supplementary Figure 1.</b> Multicollinearity diagnostic of all the predictive variables using Variance Inflation Factors (VIF)                  | 2           |
| <b>Supplementary Figure 2.</b> Multicollinearity diagnostic of the included predictive variables using Variance Inflation Factors (VIF)             | 3           |
| <b>Supplementary Figure 3.</b> Relative importance of predictors in the predictive model                                                            | 4           |
| <b>Supplementary Figure 4.</b> Calibration curve of the nomogram for intrapartum cesarean delivery prediction in nulliparous women                  | 5           |
| <b>Supplementary Figure 5.</b> Comparison of ROC curves for the three predictive models in nulliparous women                                        | 6           |
| <b>Supplementary Figure 6.</b> Comparison of ROC curves between the enhanced induction-specific nomogram and established clinical models            | 7           |
| <b>Supplementary Table 1.</b> Performance comparison of three predictive models at the optimal cutoff points (N = 705)                              | 8           |
| <b>Supplementary Table 2.</b> Multivariable analyses of independent risk factors for intrapartum cesarean delivery in nulliparous women             | 9           |
| <b>Supplementary Table 3.</b> Adjusted odds ratios for intrapartum cesarean delivery predictors stratified by mode of labor onset                   | 10          |
| <b>Supplementary Table 4.</b> Univariable and multivariable analyses of independent risk factors for intrapartum cesarean delivery in induced women | 11          |
| <b>Supplementary Table 5.</b> Clinical applicability of the online dynamic nomogram                                                                 | 12          |

**Supplementary Figure 1. Multicollinearity diagnostic of all the predictive variables using Variance Inflation Factors (VIF)**

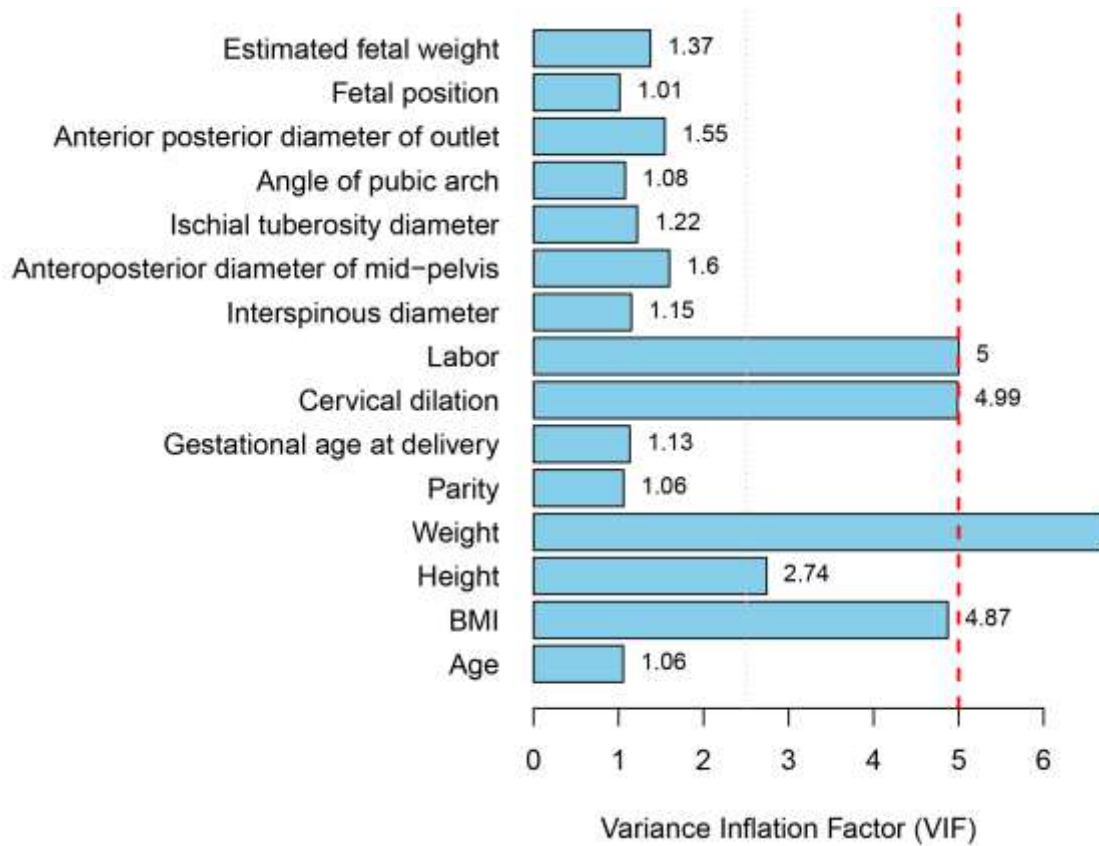

The bar chart illustrates the VIF values for maternal characteristics and clinical parameters. The dashed red line represents the commonly accepted threshold of 5.

**Supplementary Figure 2. Multicollinearity diagnostic of the included predictive variables using Variance Inflation Factors (VIF)**

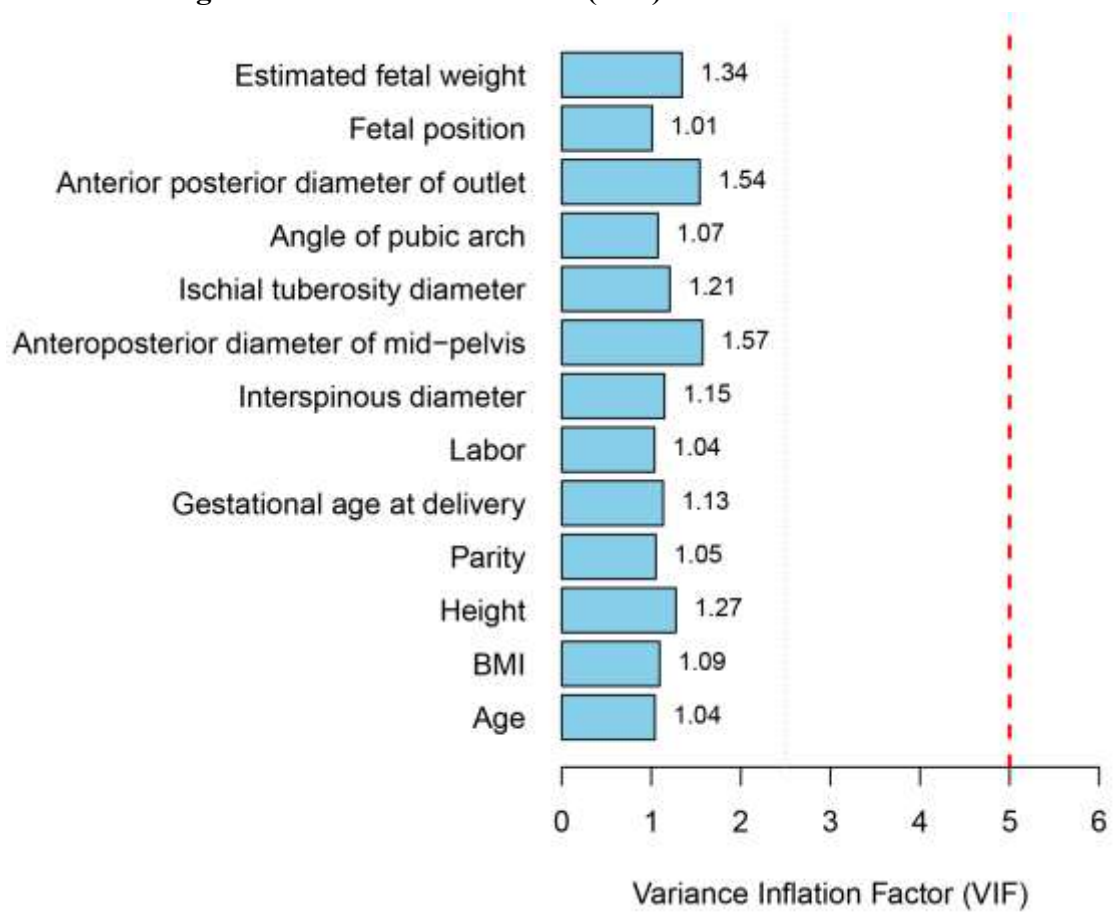

The bar chart illustrates the VIF values for maternal characteristics and clinical parameters. The dashed red line represents the commonly accepted threshold of 5.

**Supplementary Figure 3. Relative importance of predictors in the predictive model**

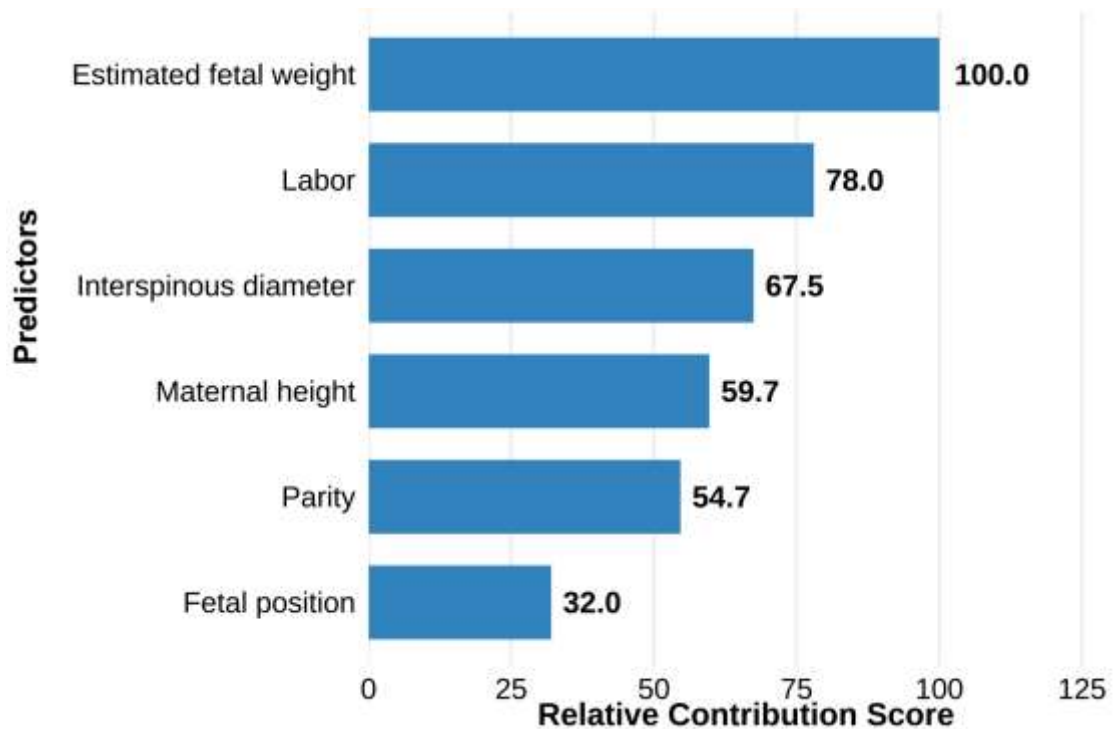

The chart displays the relative contribution of each variable to the final predictive model. Importance scores were derived from the Wald Z-statistics of the multivariable logistic regression analysis and standardized to a scale of 0-100, where a score of 100 represents the most significant predictor. Estimated fetal weight emerged as the primary contributor, followed by labor induction and interspinous diameter (measured via LaborPro system). Traditional maternal factors such as height and parity showed moderate contributions, while fetal position had the least relative impact on the model's discrimination capacity.

**Supplementary Figure 4. Calibration curve of the nomogram for intrapartum cesarean delivery prediction in nulliparous women.**

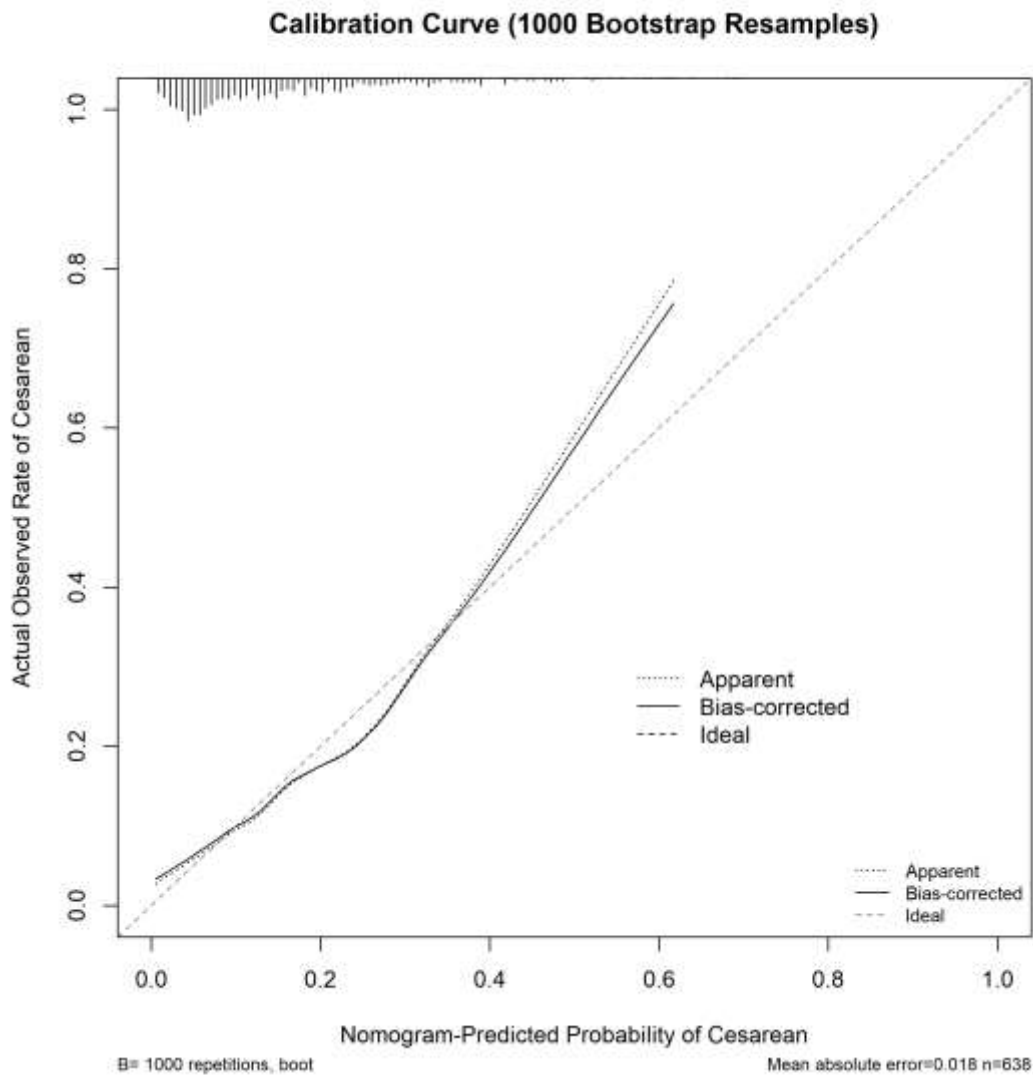

The x-axis represents the predicted probability calculated by the nomogram, and the y-axis represents the actual observed rate of cesarean delivery. The dashed line represents the ideal performance of a perfect model (diagonal 45-degree line). The dotted line represents the apparent performance of the model, and the solid line shows the bias-corrected performance after internal validation via 1000 bootstrap resamples. The mean absolute error was 0.018, suggesting strong consistency between the model's predictions and actual observations (n = 638).

**Supplementary Figure 5. Comparison of ROC curves for the three predictive models in nulliparous women.**

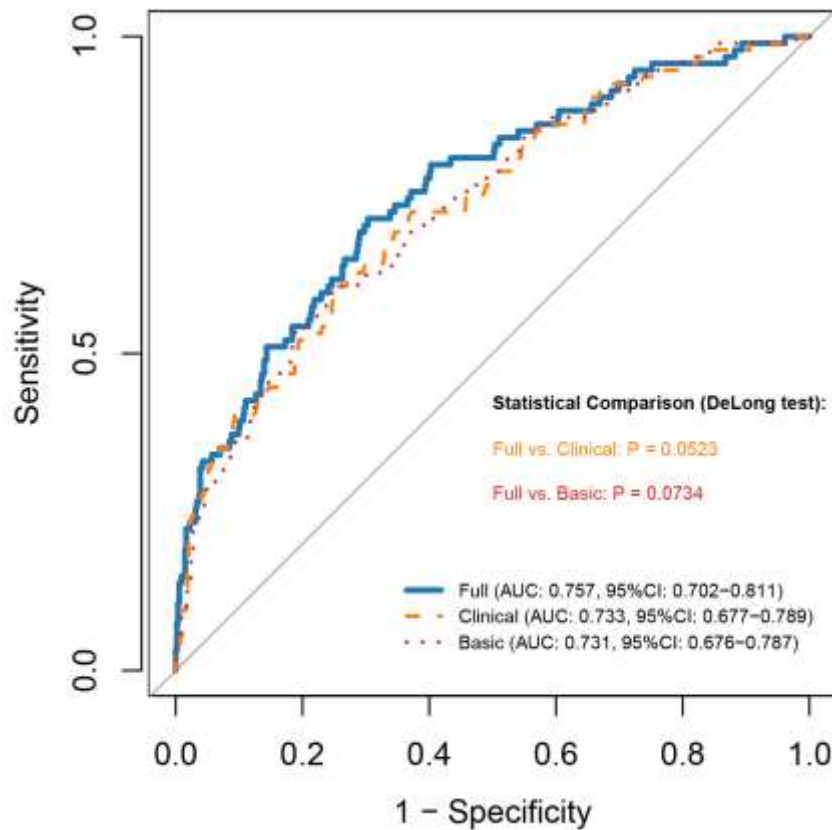

The ROC curves represent the discrimination performance of the full model (solid blue line), the clinical model (dashed orange line, excluding interspinous diameter), and the basic model (dotted red line, further excluding fetal position). Pairwise comparisons of AUCs were performed using the DeLong test. Abbreviations: ROC: receiver operating characteristic, AUC: area under the curve.

**Supplementary Figure 6. Comparison of ROC curves between the enhanced induction-specific nomogram and established clinical models.**

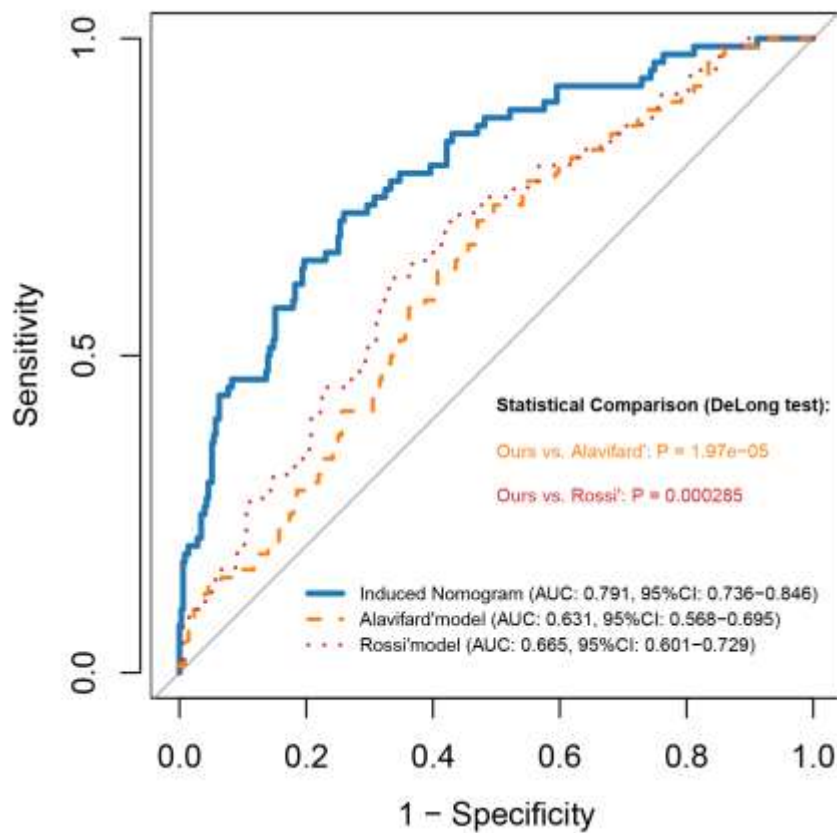

The solid blue line represents the enhanced induction nomogram, which incorporates both internal pelvic dimensions and the Bishop score. The dashed orange and dotted red lines represent the models developed by Alavifard et al. and Rossi et al., respectively. Pairwise comparisons of AUCs were performed using the DeLong test. Abbreviations: ROC: receiver operating characteristic, AUC: area under the curve.

**Supplementary Table 1. Performance comparison of three predictive models at the optimal cutoff points (N = 705)**

| <b>Metrics</b>                          | <b>Full Model (LaborPro)</b> | <b>Clinical Model</b> | <b>Basic Model</b>  |
|-----------------------------------------|------------------------------|-----------------------|---------------------|
| <b>Discrimination</b>                   |                              |                       |                     |
| AUC (95% CI)                            | 0.771 (0.720-0.823)          | 0.752 (0.701-0.804)   | 0.751 (0.699-0.802) |
| <i>P</i> -value (vs. Full) <sup>a</sup> | Reference                    | 0.067                 | 0.087               |
| <b>Classification Performance</b>       |                              |                       |                     |
| Sensitivity (%)                         | 70.83                        | 70.83                 | 73.96               |
| Specificity (%)                         | 73.07                        | 67.16                 | 62.73               |
| PPV (%)                                 | 29.31                        | 25.37                 | 23.83               |
| NPV (%)                                 | 94.08                        | 93.59                 | 93.86               |
| Accuracy (%)                            | 72.77                        | 67.66                 | 64.26               |
| Kappa Value                             | 0.275                        | 0.217                 | 0.195               |
| <b>Confusion Matrix</b>                 |                              |                       |                     |
| TP / FP                                 | 68 / 164                     | 68 / 200              | 71 / 227            |
| TN / FN                                 | 445 / 28                     | 409 / 28              | 382 / 25            |

Abbreviations: AUC, Area Under the Receiver Operating Characteristic Curve; CI, Confidence Interval; PPV, Positive Predictive Value; NPV, Negative Predictive Value; TP, True Positive; FP, False Positive; TN, True Negative; FN, False Negative. <sup>a</sup> Statistical significance of the differences between AUCs was assessed using the DeLong test, with the full model as the reference. Optimal cutoff: All metrics were calculated based on the optimal threshold determined by the Youden Index (Sensitivity + Specificity - 1).

**Supplementary Table 2. Multivariable analyses of independent risk factors for intrapartum cesarean delivery in nulliparous women.**

| Variables                     | Overall (n=705)        |         | Nulliparous (n=638)  |         |
|-------------------------------|------------------------|---------|----------------------|---------|
|                               | Adjusted OR (95%CI)    | P       | Adjusted OR (95%CI)  | P       |
| Height (cm)                   | 0.929 (0.880, 0.980)   | 0.007   | 0.925 (0.879, 0.974) | 0.003   |
| Parity                        |                        | 0.002   |                      |         |
| Multiparous                   | Ref                    |         | NA                   |         |
| Nulliparous                   | 10.676 (2.375, 47.981) |         | NA                   |         |
| Labor                         |                        | < 0.001 |                      | < 0.001 |
| Spontaneous                   | Ref                    |         | Ref                  |         |
| Induced                       | 3.288 (1.818, 5.945)   |         | 3.323 (1.854, 5.958) |         |
| Interspinous diameter (cm)    | 0.518 (0.362, 0.742)   | < 0.001 | 0.504 (0.356, 0.714) | < 0.001 |
| Fetal position                |                        | 0.104   |                      | 0.104   |
| Occiput anterior              | Ref                    |         | Ref                  |         |
| Occiput posterior             | 2.151 (1.053, 4.394)   | 0.036   | 2.156 (1.062, 4.378) | 0.034   |
| Occiput transverse            | 2.092 (0.882, 4.962)   | 0.094   | 1.924 (0.809, 4.575) | 0.138   |
| Estimated fetal weight (100g) | 1.304 (1.180, 1.441)   | < 0.001 | 1.303 (1.181, 1.436) | < 0.001 |

OR: odds ratio; CI: confidence interval; NA: not applicable

**Supplementary Table 3. Adjusted odds ratios for intrapartum cesarean delivery predictors stratified by mode of labor onset.**

| <b>Variables</b>                               | <b>Subgroup</b> | <b>Adjusted OR<br/>(95%CI)</b> | <b>P-value</b> |
|------------------------------------------------|-----------------|--------------------------------|----------------|
| <b>Height (cm)</b>                             |                 |                                |                |
|                                                | Spontaneous     | 0.91 (0.82, 1.02)              | 0.121          |
|                                                | Induced         | 0.92 (0.87, 0.98)              | 0.005          |
| <b>Nulliparous vs. Multiparous</b>             |                 |                                |                |
|                                                | Spontaneous     | NA                             | NA             |
|                                                | Induced         | 7.87 (1.74, 35.71)             | 0.007          |
| <b>Interspinous diameter (cm)</b>              |                 |                                |                |
|                                                | Spontaneous     | 0.58 (0.27, 1.26)              | 0.17           |
|                                                | Induced         | 0.50 (0.34, 0.74)              | <0.001         |
| <b>Occiput posterior vs. Occiput anterior</b>  |                 |                                |                |
|                                                | Spontaneous     | 1.29 (0.34, 4.86)              | 0.709          |
|                                                | Induced         | 2.55 (1.11, 5.84)              | 0.027          |
| <b>Occiput transverse vs. Occiput anterior</b> |                 |                                |                |
|                                                | Spontaneous     | 0.46 (0.05, 4.71)              | 0.513          |
|                                                | Induced         | 2.88 (1.09, 7.63)              | 0.034          |
| <b>Estimated fetal weight (100g)</b>           |                 |                                |                |
|                                                | Spontaneous     | 1.09 (0.89, 1.33)              | 0.412          |
|                                                | Induced         | 1.36 (1.22, 1.52)              | <0.001         |

OR: odds ratio; CI: confidence interval; NA: not applicable

**Supplementary Table 4. Univariable and multivariable analyses of independent risk factors for intrapartum cesarean delivery in induced women.**

| Variables                                  | Unadjusted OR (95%CI) | P-value | Adjusted OR (95%CI)   | P-value |
|--------------------------------------------|-----------------------|---------|-----------------------|---------|
| Age, year                                  | 1.055 (0.984, 1.132)  | 0.130   | Not included          |         |
| Height, cm                                 | 0.940 (0.895, 0.988)  | 0.014   | 0.927 (0.873, 0.985)  | 0.014   |
| Pre-pregnancy BMI, kg/m <sup>2</sup>       | 1.049 (0.971, 1.134)  | 0.227   | Not included          |         |
| Parity                                     |                       | 0.035   |                       | 0.014   |
| Multiparous                                | Ref                   |         | Ref                   |         |
| Nulliparous                                | 4.735 (1.118, 20.052) |         | 6.921 (1.482, 32.329) |         |
| Highest level of education                 |                       | 0.368   | Not included          |         |
| Primary or secondary school                | Ref                   |         | Not included          |         |
| University                                 | 0.673 (0.353, 1.283)  | 0.229   | Not included          |         |
| Higher professional education              | 0.980 (0.382, 2.516)  | 0.967   | Not included          |         |
| Gestational age at delivery                |                       | 0.299   | Not included          |         |
| 37 weeks 0 days to 37 weeks 6 days         | Ref                   |         | Not included          |         |
| 38 weeks 0 days to 38 weeks 6 days         | 0.712 (0.130, 3.909)  | 0.696   | Not included          |         |
| 39 weeks 0 days to 39 weeks 6 days         | 1.750 (0.381, 8.040)  | 0.472   | Not included          |         |
| 40 weeks 0 days to 40 weeks 6 days         | 1.893 (0.410, 8.750)  | 0.414   | Not included          |         |
| 41 weeks 0 days to 41 weeks 6 days         | 1.750 (0.205, 14.931) | 0.609   | Not included          |         |
| Bishop score for induction                 | 0.586 (0.458, 0.749)  | < 0.001 | 0.586 (0.447, 0.769)  | < 0.001 |
| Interspinous diameter, cm                  | 0.546 (0.385, 0.773)  | 0.001   | 0.519 (0.343, 0.786)  | 0.002   |
| Anteroposterior diameter of mid-pelvis, cm | 0.779 (0.511, 1.189)  | 0.247   | Not included          |         |
| Ischial tuberosity diameter, cm            | 0.762 (0.588, 0.988)  | 0.040   | 0.906 (0.663, 1.238)  | 0.536   |
| Anterior posterior diameter of outlet, cm  | 0.738 (0.454, 1.197)  | 0.518   | Not included          |         |
| Angle of pubic arch, degree                | 0.981 (0.951, 1.012)  | 0.219   | Not included          |         |
| Fetal position                             |                       | 0.037   |                       | 0.086   |
| Occiput anterior                           | Ref                   |         | Ref                   |         |
| Occiput posterior                          | 2.124 (0.967, 4.668)  | 0.061   | 2.399 (1.033, 5.574)  | 0.042   |
| Occiput transverse                         | 3.326 (1.328, 8.331)  | 0.010   | 2.835 (1.048, 7.665)  | 0.040   |
| Estimated fetal weight (100g)              | 1.213 (1.107, 1.330)  | < 0.001 | 1.363 (1.217, 1.526)  | < 0.001 |

OR: odds ratio; CI: confidence interval

**Supplementary Table 5. Clinical applicability of the online dynamic nomogram**

| <b>Variable</b>                                     | <b>Patient 1</b>                                           | <b>Patient 2</b>                                                                                    | <b>Patient 3</b>                                                               |
|-----------------------------------------------------|------------------------------------------------------------|-----------------------------------------------------------------------------------------------------|--------------------------------------------------------------------------------|
| Parity                                              | Multiparous                                                | Nulliparous                                                                                         | Nulliparous                                                                    |
| Maternal height, cm                                 | 160                                                        | 155                                                                                                 | 152                                                                            |
| Onset of labor                                      | Spontaneous                                                | Induced                                                                                             | Induced                                                                        |
| Interspinous diameter, cm                           | 10                                                         | 10                                                                                                  | 9                                                                              |
| Fetal position                                      | Occiput anterior                                           | Occiput anterior                                                                                    | Occiput posterior                                                              |
| Estimated fetal weight, g                           | 3200                                                       | 3500                                                                                                | 3800                                                                           |
| Predicted risk of intrapartum cesarean delivery (%) | 4%                                                         | 29.6%                                                                                               | 83.0%                                                                          |
| Suggestion                                          | Encourage continued trial of labor with routine monitoring | Individualized monitoring and timely intervention are most critical to optimizing maternal outcomes | A more proactive surgical approach might be discussed to avoid traumatic labor |
